# Supplementary material for: Factors Associated With Psychological Disturbances During the COVID-19 Pandemic: Multicountry Online Study
Source: PubMed Central journal article supplement (PMC8396308; doi:10.2196/28736), 2021-08-19
Supplement: mental_v8i8e28736_app2.pdf [file mental_v8i8e28736_app2.pdf]

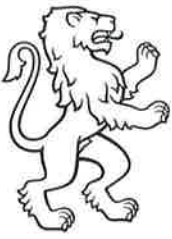

Kanton Zürich  
**Kantonale Ethikkommission**

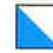

**Prof. Dr. med. Peter Meier-Abt**  
Präsident

**Dr. med. Peter Kleist**  
Geschäftsführer  
Stampfenbachstrasse 121  
Postfach  
8090 Zürich  
Telefon +41 43 259 79 70  
Fax +41 43 259 79 72  
[www.kek.zh.ch](http://www.kek.zh.ch)

Brain Research Institute  
Dr. Ali Jawaid  
Dörflistrasse. 67. 401  
8050 Zurich

16. April 2020 / ktr

**BASEC-Nr. Req-2020-00419**

**Clarification of responsibility**

**Title: It is an anonymous global survey on mental health impact of COVID-19. The results of this survey could be invaluable in informing health systems about the impact of COVID-19 and its associated factors, such as social disconnectedness on mental health of masses.**

Dear Doctor Jawaid

We refer to your submission dated 11.04.2020.

Your research project does not fall within the scope of the Human Research Act (HRA). Therefore, an authorization from the ethics committee is not required.

Kindly note that an invoice in the amount of CHF 200.- will be issued by the cantonal accounts department.

Sincerely yours,



Peter Kleist
