# Supplementary material for: Factors Associated With Psychological Disturbances During the COVID-19 Pandemic: Multicountry Online Study
Source: PubMed Central journal article supplement (PMC8396308; doi:10.2196/28736), 2021-08-19
Supplement: mental_v8i8e28736_app3.pdf [file mental_v8i8e28736_app3.pdf]

**NENCKI INSTITUTE OF EXPERIMENTAL BIOLOGY**  
**Laboratory for Neurobiology**  
**02-093 Warsaw, Pasteura 3, Poland**

phone: (48-22) 659 30 01  
fax: (48-22) 822 53 42  
<http://neurogene.nencki.gov.pl>

*Leszek Kaczmarek, Ph.D.*  
*Professor and Head, BRAINCITY President*  
*Member: Polish Academy of Sciences, EMBO, Academia Europaea*  
Email: [l.kaczmarek@nencki.edu.pl](mailto:l.kaczmarek@nencki.edu.pl)

April 3<sup>rd</sup> 25, 2020

To whom it may concern,

With this letter, I am expressing my full support for the project “Mental health impact of COVID-19: A risk and resilience study” led by Dr. Ali Jawaid, the newly recruited Senior Group Leader at the BRAINCITY: Center of Excellence for Neural Plasticity & Brain Disorders, recently created at the Nencki Institute as the European Molecular Biology (EMBL) partnership.

This global study aiming at screening for psychological and psychosomatic manifestations of depression, anxiety, and post-traumatic stress disorder (PTSD) among people that are either directly or indirectly affected by the COVID-19 pandemic is very timely, important and shall bring significant results regarding possible long-lasting debilitating consequences of the present situation.

The results of the proposed, fully anonymous, survey could be invaluable in informing health systems about the impact of COVID-19 pandemic and its associated factors, such as social disconnectedness, stress, disrupted routine etc. on mental health of large populations of people.



*Leszek Kaczmarek, BRAINCITY President*
